# Supplementary material for: Implementation of evidence-based primary cancer prevention interventions in MA community health centers: an explanatory sequential mixed methods study
Source: Research Square preprint supplement (doi:10.21203/rs.3.rs-2588180/v1), 2023-02-20
Supplement: Supplementary file 1 [file 762a8ef25f5a958025336b2b.docx]

**I. BACKGROUND/PARTNERSHIPS (5 Minutes)**

1. First, to help me understand who is involved with nutrition, physical activity, and tobacco control efforts at your agency, will you please describe your role within your organization?

*PROBES:*

- What is your title within your organization?
- What division/department do you work in?
- Who do you report to?
- How does your division/department fit within your larger organizational structure?

**II. EBI IMPLEMENTATION (20-40 Minutes depending on # of programs, ask Q2-11 for each evidence-based strategy and open response addition listed on the survey)**

1. In [insert month 2020], your survey suggested that you implemented *[insert first intervention from survey]* for cancer prevention. Is this strategy still in use? ***If no, skip to question 11.***

**If yes** **still in use:**

1. How is the strategy currently being implemented?

*PROBES:*

- Who delivers it? To whom? When?
- Where? At the community health center or elsewhere in the community?
- Are there partners involved in implementation?

1. Can you tell me more about why and how your [community health center or organization] selected this strategy?
2. How long have you been implementing this strategy? How many years?
3. Can you tell me who was involved in selecting this strategy?
4. Is the strategy easy or difficult to implement? Were there trainings or other assistance available to staff to help deliver the strategy?
5. Very broadly, can you describe the major factors that you think have influenced your ability to implement this strategy? ***Ask the leading question and then walk through each PROBE category below.***

*PROBES:*

- What about the *characteristics of the individuals* who are implementing the program (e.g., background and skillset of the staff, role and experience of those involved, turnover)?
- What about the *organizational infrastructure*? (e.g., leadership support, available resources & funding, data systems, internal policies and processes, staff buy-in)
- How about the *influences outside your organization* (e.g., Local, state, or national policies; partnerships with local health departments, CBOs, or health systems; community characteristics; public awareness/demand)?
- Finally, what about the *characteristics of the program itself*? (such as whether the program is compatible with the way you do work in your organization, the complexity of the program)

1. How many people do you think this strategy impacts each year?
2. What effects, if any, have you noticed?

**If not still in use:**

1. Why do you think this strategy is not in use anymore?

*PROBES:*

- *If they don’t use this intervention strategy anymore:*
  - - - What do you know about how it was implemented in the past?
      - Who delivered it? To whom? When? Where? For how long?
      - Are there any other similar strategies you are currently using instead?

1. Are there any other nutrition, physical activity, or tobacco control strategies your organization is currently implementing to address cancer prevention? *If yes, walk through implementation questions again.*
2. Are there any other nutrition, physical activity, or tobacco control strategies your organization ***used in the past*** to address cancer prevention?

*PROBES:*

- - - - Why do you think this strategy is not in use anymore?
      - What do you know about how it was implemented in the past?
      - Who delivered it? To whom? When? Where? For how long?

**III. IMPACT OF 2020 EVENTS AND FUTURE IMPLEMENTATION (15-20 minutes)**

To wrap up the interview, I’d like to shift gears to discuss the impacts you’ve experienced from COVID-19 over the course of the last year and think forward to what future nutrition, physical activity, and tobacco control efforts will look like at your organization.

14. How have things changed in your organization since the coronavirus hit the U.S.?

*PROBES:*

- *How are things going?*
- *How has the coronavirus affected your organization?*
- *How has the coronavirus affected your day-to-day work?*

15. How has the coronavirus affected your organization’s collaborations and networks?

*PROBES:*

- *How has it affected your organization’s ability to collaborate internally?*
- *How has it affected your organization’s ability to collaborate with external partner?*
- *How might your ongoing collaborations look different?*
- *Are you collaborating with organizations you haven’t worked with previously to address your community’s health related needs?*

16. The issues of racism and police violence have also recently become public health issues at the forefront of the American consciousness. How has this national attention impacted your organization?

*PROBES:*

- *Have you made any changes to your organization’s practices or policies? What do those look like?*
- *Have additional resources (e.g. financial, personnel) been made available to you in light of recent events? What do those look like? What are your plans for use of those resources and what restrictions have been outlined by funders?*

17. How do you think the events of the last year will affect future nutrition, physical activity, and tobacco control efforts?

18. Are there any changes to the nutrition, physical activity, or tobacco control strategies your organization is ***planning to use in the future*** to address cancer prevention?

*Probes:*

- - - - Why do you expect these changes?
      - What do you know about how it will be implemented?
      - Who will deliver it? To whom? When? Where? For how long?

19. Is there is anything else you’d like to share with me about your efforts to address nutrition, physical activity, and tobacco control at your organizations? Anything that I missed?
