# Supplementary material for: Implementation of evidence-based primary cancer prevention interventions in MA community health centers: an explanatory sequential mixed methods study
Source: Research Square preprint supplement (doi:10.21203/rs.3.rs-2588180/v1), 2023-02-20
Supplement: Supplementary file 2 [file cb13e6ab3902f84f7216cf25.docx]

O’Cathain, Murphy, and Nicholl (2008) Good Reporting of a Mixed Methods Study (GRAMMS): –

| Describe the justification for using a mixed methods approach to the research question | Lines 96-101 |
| --- | --- |
| Describe the design in terms of the purpose, priority, and sequence of methods | Lines 96-101 |
| Describe each method in terms of sampling, data collection and analysis | Sequential design, so methods appear sequentially in the text  Quant: Lines 114-149  Qual: Lines 149-182 |
| Describe where integration has occurred, how it has occurred, and who has participated in it | Design – structure of qual interview prompted based on quant adoption data: Lines 161-163  Results - Table 2 |
| Describe any limitation of one method associated with the presence of the other method | None identified |
| Describe any insights gained from mixing or integrating methods | Table 2  Lines 496-499 |
